# Supplementary material for: Guinea grass (Megathyrsus maximus) agronomic performances in mixed cultivation using irrigation condition, North-Western Ethiopia
Source: PubMed Central journal article supplement (PMC11801539; doi:10.1371/journal.pone.0316565), 2025-02-06
Supplement: pone.0316565.s001.pdf [file pone.0316565.s001.pdf]

S1 file. Raw data collected from plant morphology and dry matter yield per ha (DOCX)

| Block | SP   | HA    | PH | TNPP  | NLPP   | LLPP  | NRPP   | RLPP | LSR  |
|-------|------|-------|----|-------|--------|-------|--------|------|------|
| B1    | SP20 | HA60  | 51 | 35.35 | 249.25 | 18.41 | 76.19  | 5.90 | 1.48 |
| B1    | SP20 | HA90  | 64 | 41.30 | 352.00 | 20.30 | 94.45  | 6.33 | 1.39 |
| B1    | SP20 | HA120 | 79 | 55.20 | 389.00 | 26.30 | 101.67 | 6.66 | 1.23 |
| B1    | SP30 | HA60  | 59 | 36.90 | 257.00 | 19.30 | 77.30  | 5.72 | 1.67 |
| B1    | SP30 | HA90  | 67 | 42.50 | 361.00 | 21.30 | 96.40  | 6.20 | 1.45 |
| B1    | SP30 | HA120 | 91 | 50.32 | 387.00 | 25.35 | 102.23 | 6.70 | 1.20 |
| B1    | SP40 | HA60  | 57 | 34.70 | 269.00 | 19.15 | 78.30  | 6.12 | 1.72 |
| B1    | SP40 | HA90  | 75 | 45.30 | 364.00 | 22.43 | 95.40  | 6.43 | 1.39 |
| B1    | SP40 | HA120 | 81 | 51.70 | 402.00 | 27.25 | 107.60 | 6.90 | 1.32 |
| B2    | SP20 | HA60  | 49 | 36.20 | 243.60 | 17.60 | 74.60  | 5.30 | 1.46 |
| B2    | SP20 | HA90  | 71 | 41.60 | 359.60 | 22.10 | 94.90  | 6.04 | 1.36 |
| B2    | SP20 | HA120 | 80 | 50.30 | 401.60 | 25.90 | 103.20 | 6.90 | 1.24 |
| B2    | SP30 | HA60  | 61 | 37.80 | 249.30 | 18.90 | 75.20  | 5.60 | 1.64 |
| B2    | SP30 | HA90  | 71 | 43.80 | 372.50 | 23.40 | 98.10  | 6.40 | 1.39 |
| B2    | SP30 | HA120 | 87 | 51.90 | 405.70 | 27.60 | 106.30 | 7.03 | 1.29 |
| B2    | SP40 | HA60  | 67 | 38.40 | 257.40 | 19.30 | 78.90  | 5.80 | 1.71 |
| B2    | SP40 | HA90  | 74 | 44.60 | 367.20 | 23.80 | 97.30  | 6.50 | 1.39 |
| B2    | SP40 | HA120 | 93 | 53.60 | 411.30 | 29.30 | 109.80 | 7.30 | 1.32 |
| B3    | SP20 | HA60  | 48 | 35.90 | 246.20 | 17.81 | 73.90  | 4.90 | 1.42 |
| B3    | SP20 | HA90  | 72 | 40.80 | 362.80 | 22.80 | 93.90  | 6.30 | 1.41 |
| B3    | SP20 | HA120 | 83 | 50.60 | 398.70 | 25.30 | 102.40 | 7.20 | 1.30 |
| B3    | SP30 | HA60  | 63 | 34.10 | 251.20 | 18.40 | 74.90  | 5.70 | 1.69 |
| B3    | SP30 | HA90  | 76 | 44.10 | 371.90 | 24.10 | 97.60  | 6.70 | 1.43 |
| B3    | SP30 | HA120 | 89 | 51.90 | 406.46 | 26.90 | 107.20 | 7.63 | 1.31 |
| B3    | SP40 | HA60  | 66 | 39.20 | 258.70 | 19.80 | 77.10  | 5.90 | 1.80 |
| B3    | SP40 | HA90  | 76 | 45.20 | 369.30 | 24.60 | 98.10  | 6.40 | 1.60 |
| B3    | SP40 | HA120 | 94 | 53.20 | 415.30 | 30.20 | 112.10 | 8.30 | 1.20 |
