# Supplementary material for: Guinea grass (Megathyrsus maximus) agronomic performances in mixed cultivation using irrigation condition, North-Western Ethiopia
Source: PubMed Central journal article supplement (PMC11801539; doi:10.1371/journal.pone.0316565), 2025-02-06
Supplement: pone.0316565.s002.pdf [file pone.0316565.s002.pdf]

S2 file. Raw data on chemical composition analysis of Guinea grass

| Block | SP   | HA    | DM%    | OM%   | CP%   | NDF%  | ADF%  | ADL%  | Ash%  |
|-------|------|-------|--------|-------|-------|-------|-------|-------|-------|
| B1    | SP20 | HA60  | 89.34  | 86.3  | 17.19 | 71.87 | 42.33 | 10.68 | 13.7  |
| B1    | SP20 | HA90  | 90.67  | 85.65 | 15.93 | 79.84 | 46.51 | 11.05 | 14.35 |
| B1    | SP20 | HA120 | 91.58  | 84.88 | 11.47 | 88.14 | 49.62 | 12.38 | 15.12 |
| B1    | SP30 | HA60  | 93.48  | 85.64 | 19.14 | 68.64 | 40.82 | 10.2  | 14.36 |
| B1    | SP30 | HA90  | 94.17  | 84.86 | 16.82 | 78.16 | 43.4  | 10.31 | 15.14 |
| B1    | SP30 | HA120 | 94.8   | 83.69 | 12.16 | 81.59 | 47.83 | 11.79 | 16.31 |
| B1    | SP40 | HA60  | 95.28  | 83.39 | 20.97 | 65.64 | 32.6  | 9.61  | 16.61 |
| B1    | SP40 | HA90  | 95.66  | 83.72 | 18.52 | 76.41 | 39.6  | 10.97 | 16.28 |
| B1    | SP40 | HA120 | 95.76  | 83.12 | 13.81 | 77.66 | 44    | 11.4  | 16.88 |
| B2    | SP20 | HA60  | 90.01  | 87.11 | 17.63 | 71.22 | 43.2  | 10.24 | 12.89 |
| B2    | SP20 | HA90  | 92.11  | 86.39 | 15.24 | 78.15 | 47.15 | 11.07 | 13.61 |
| B2    | SP20 | HA120 | 92.044 | 85.1  | 11.54 | 80.07 | 52.69 | 12.78 | 14.9  |
| B2    | SP30 | HA60  | 93.9   | 85.67 | 19.85 | 70.31 | 40.3  | 9.96  | 14.33 |
| B2    | SP30 | HA90  | 94.52  | 85.09 | 16.53 | 76.28 | 41    | 10.18 | 14.91 |
| B2    | SP30 | HA120 | 94.7   | 84.99 | 12.14 | 79.2  | 44.76 | 11.21 | 15.01 |
| B2    | SP40 | HA60  | 96.82  | 84.45 | 20.34 | 58.1  | 33.9  | 8.77  | 15.55 |
| B2    | SP40 | HA90  | 96.03  | 84.15 | 18.63 | 69.61 | 39.7  | 9.43  | 15.85 |
| B2    | SP40 | HA120 | 96.71  | 83.78 | 13.23 | 77.3  | 41.35 | 10.91 | 16.27 |
| B3    | SP20 | HA60  | 90.68  | 87.04 | 17.1  | 67.25 | 42.27 | 10.41 | 12.96 |
| B3    | SP20 | HA90  | 91.33  | 85.92 | 15.84 | 74.74 | 47.21 | 11.08 | 14.08 |
| B3    | SP20 | HA120 | 92.5   | 85.45 | 11.1  | 85.8  | 50.99 | 12.39 | 14.55 |
| B3    | SP30 | HA60  | 93.61  | 84.27 | 19.94 | 65.19 | 39.48 | 9.8   | 15.73 |
| B3    | SP30 | HA90  | 94.04  | 84.1  | 16.64 | 73.17 | 41.74 | 10.42 | 15.9  |
| B3    | SP30 | HA120 | 94.19  | 83.78 | 12.9  | 81.1  | 44.66 | 11.69 | 16.22 |
| B3    | SP40 | HA60  | 95.058 | 83.19 | 20.79 | 61.27 | 33.57 | 8.61  | 16.81 |
| B3    | SP40 | HA90  | 96.32  | 82.64 | 18.45 | 68.12 | 36.55 | 9.57  | 17.36 |
| B3    | SP40 | HA120 | 97.59  | 81.55 | 13.97 | 77.03 | 39.47 | 10.25 | 18.45 |
